# Supplementary material for: A direct, efficient synthesis of unsymmetrically substituted bis(arylidene)alkanones
Source: Royal Society of Chemistry journal article supplement (doi:10.1039/b606042k), 2006-01-01

## Supplementary Information

### A direct, efficient synthesis of unsymmetrically substituted bis(arylidene)alkanones.

Anthony E. Rosamilia, Marilena A. Giarrusso, Janet L. Scott and Christopher R. Strauss

#### NMR spectra for selected compounds 1a-d.

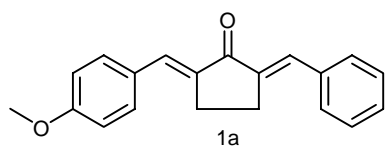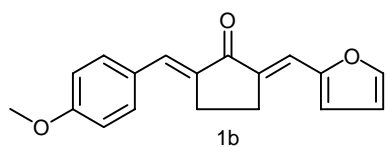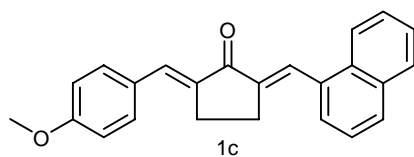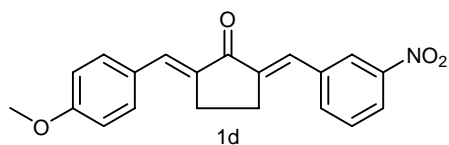

Compound 1a. Proton NMR Spectrum (units in ppm)

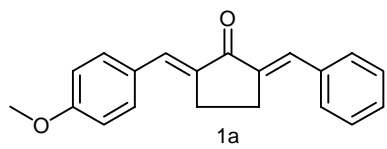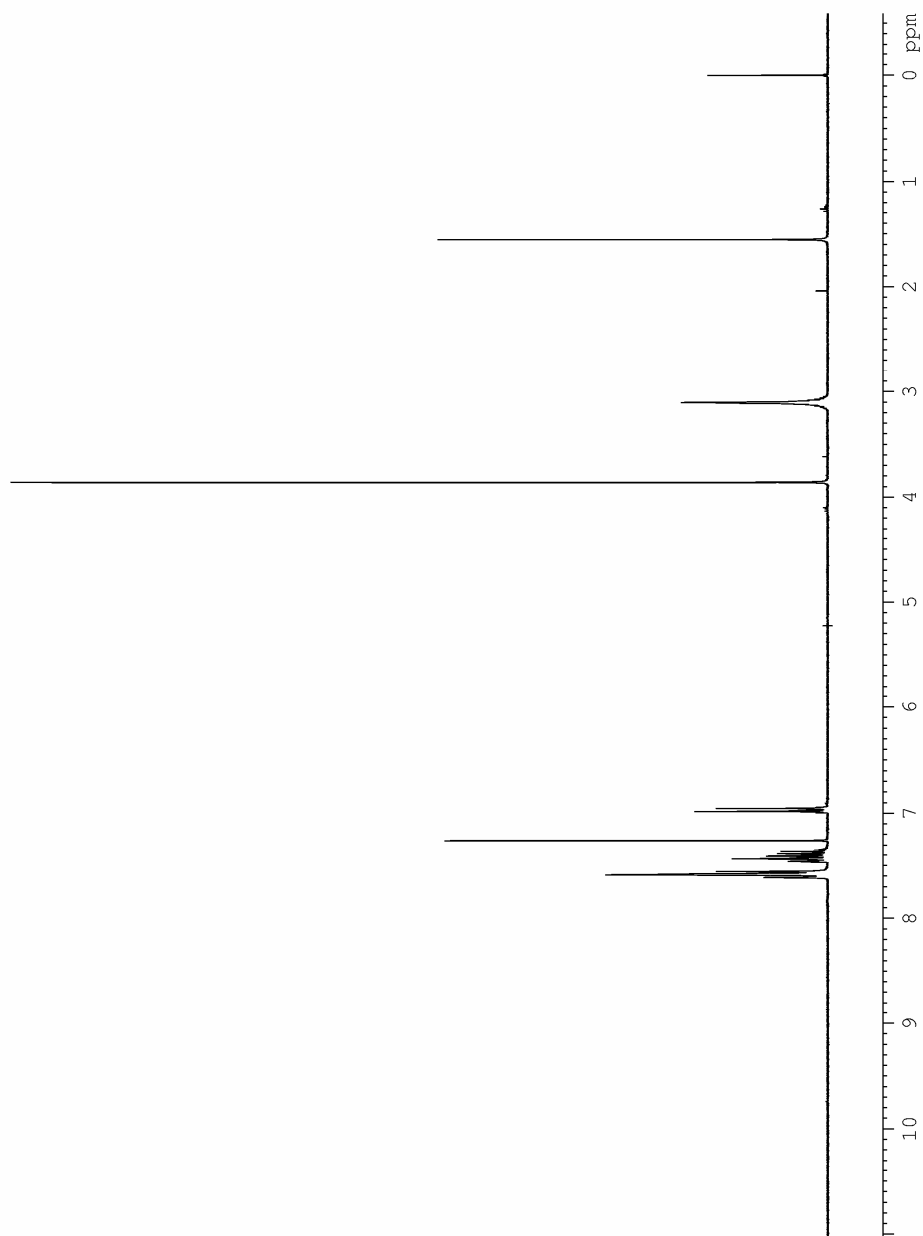

Compound 1a. Carbon NMR Spectrum (units in ppm)

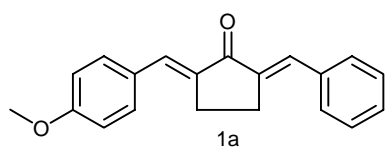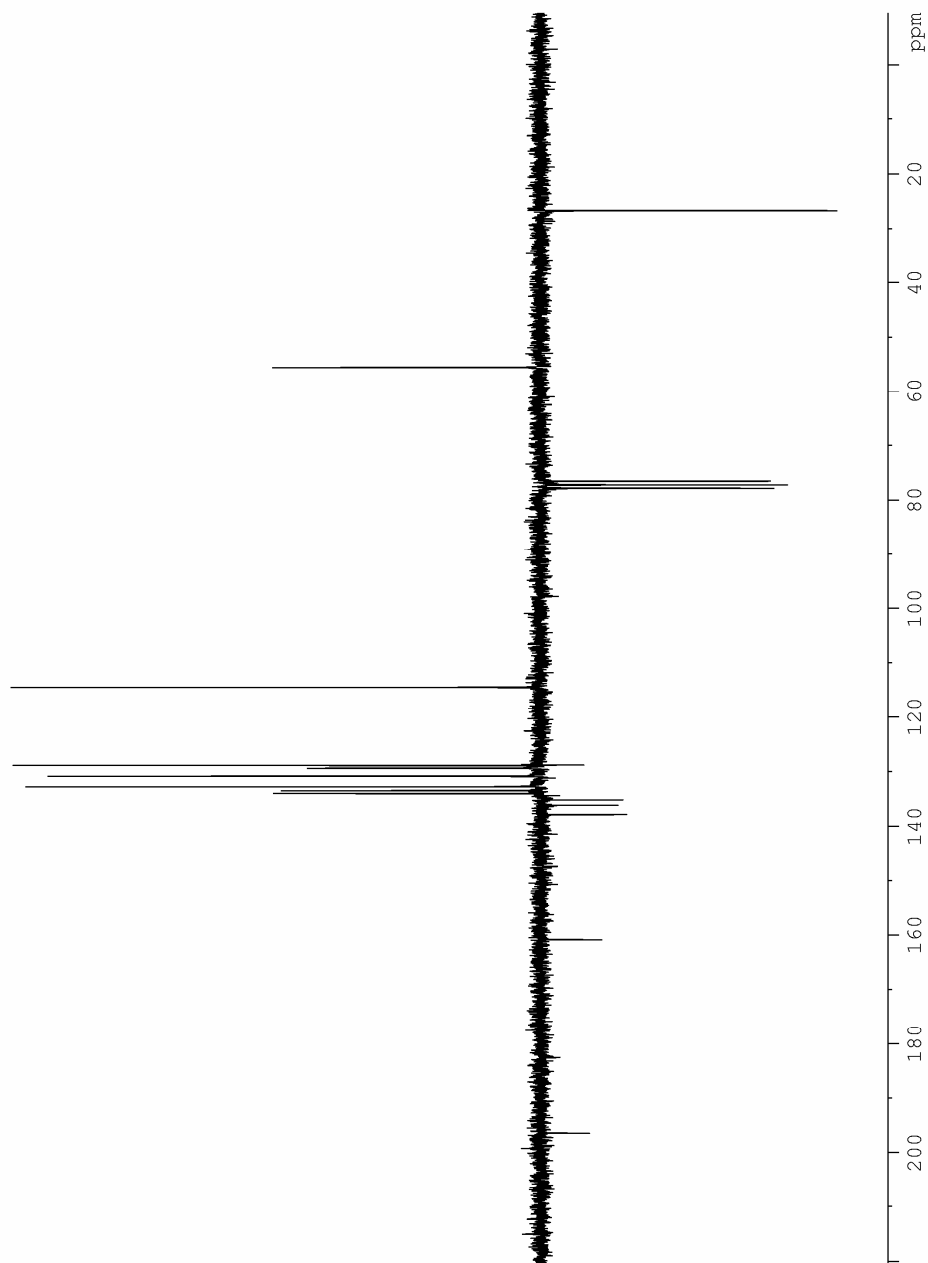

Compound 1b. Proton NMR Spectrum (units in ppm)

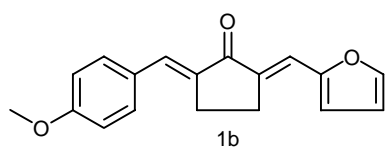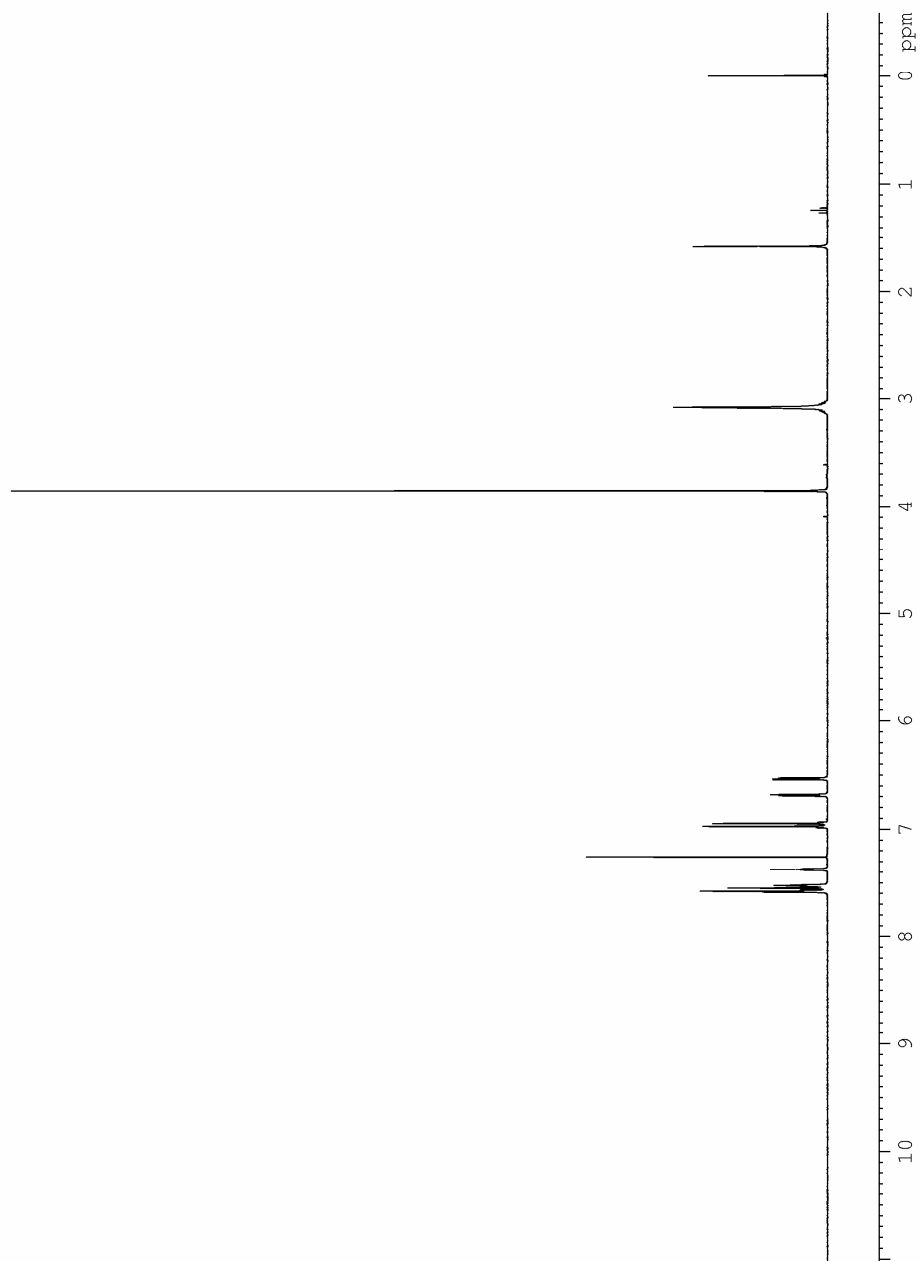

Compound 1b. Carbon NMR Spectrum (units in ppm)

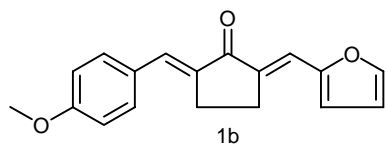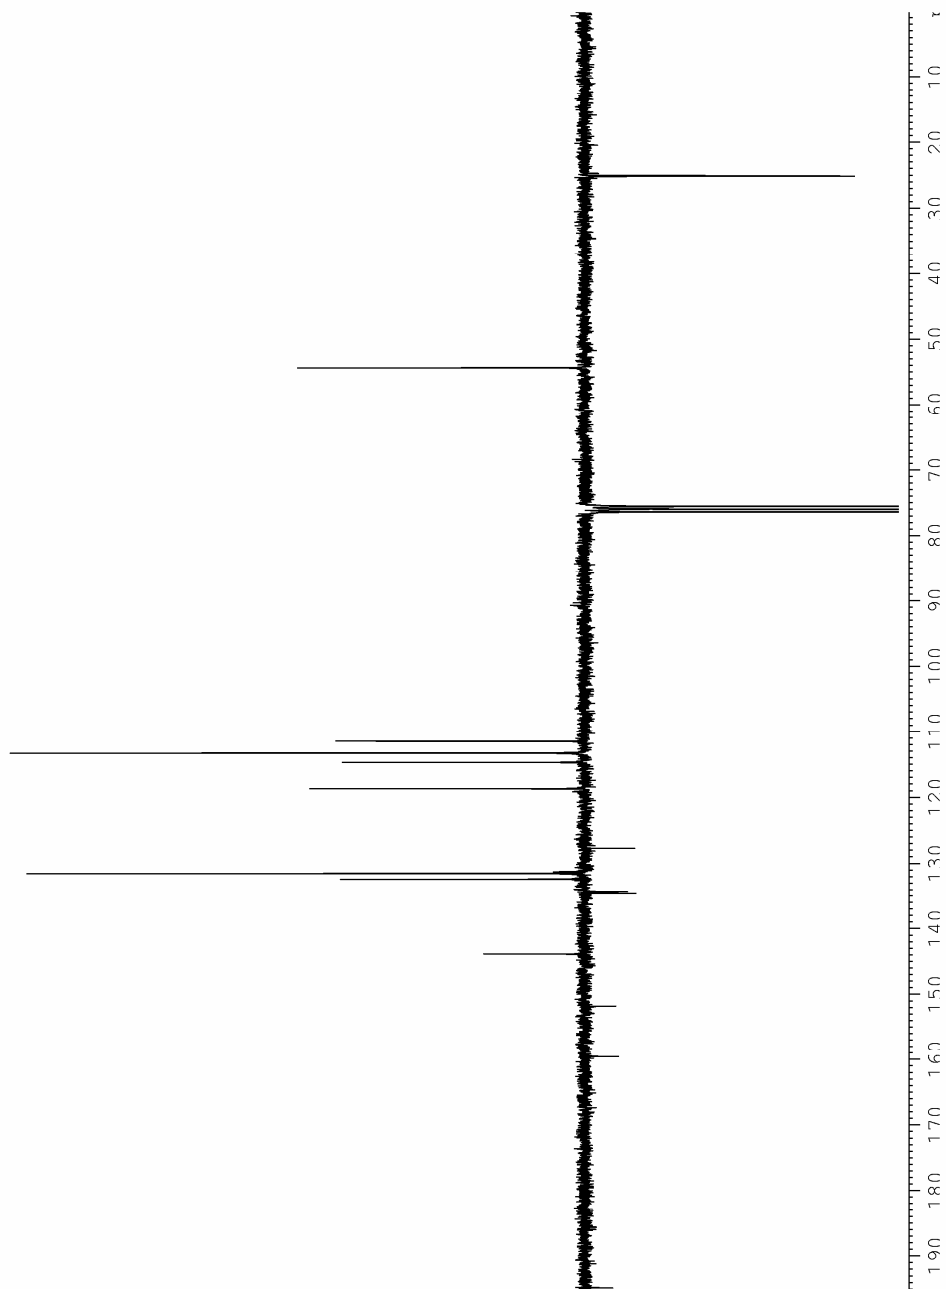

Compound 1c. Proton NMR Spectrum (units in ppm)

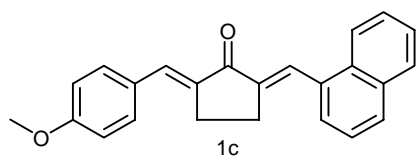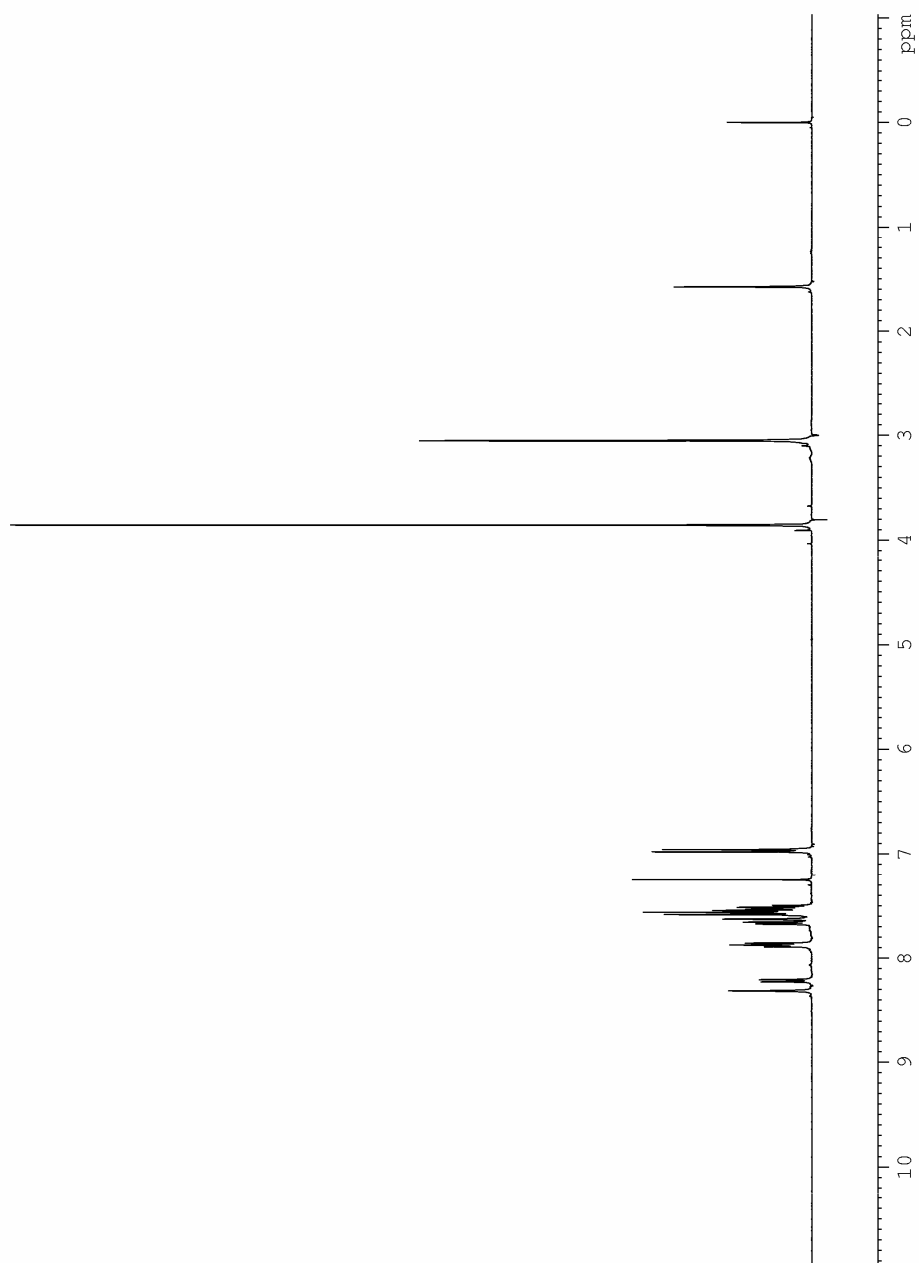

Compound 1c. Carbon NMR Spectrum (units in ppm)

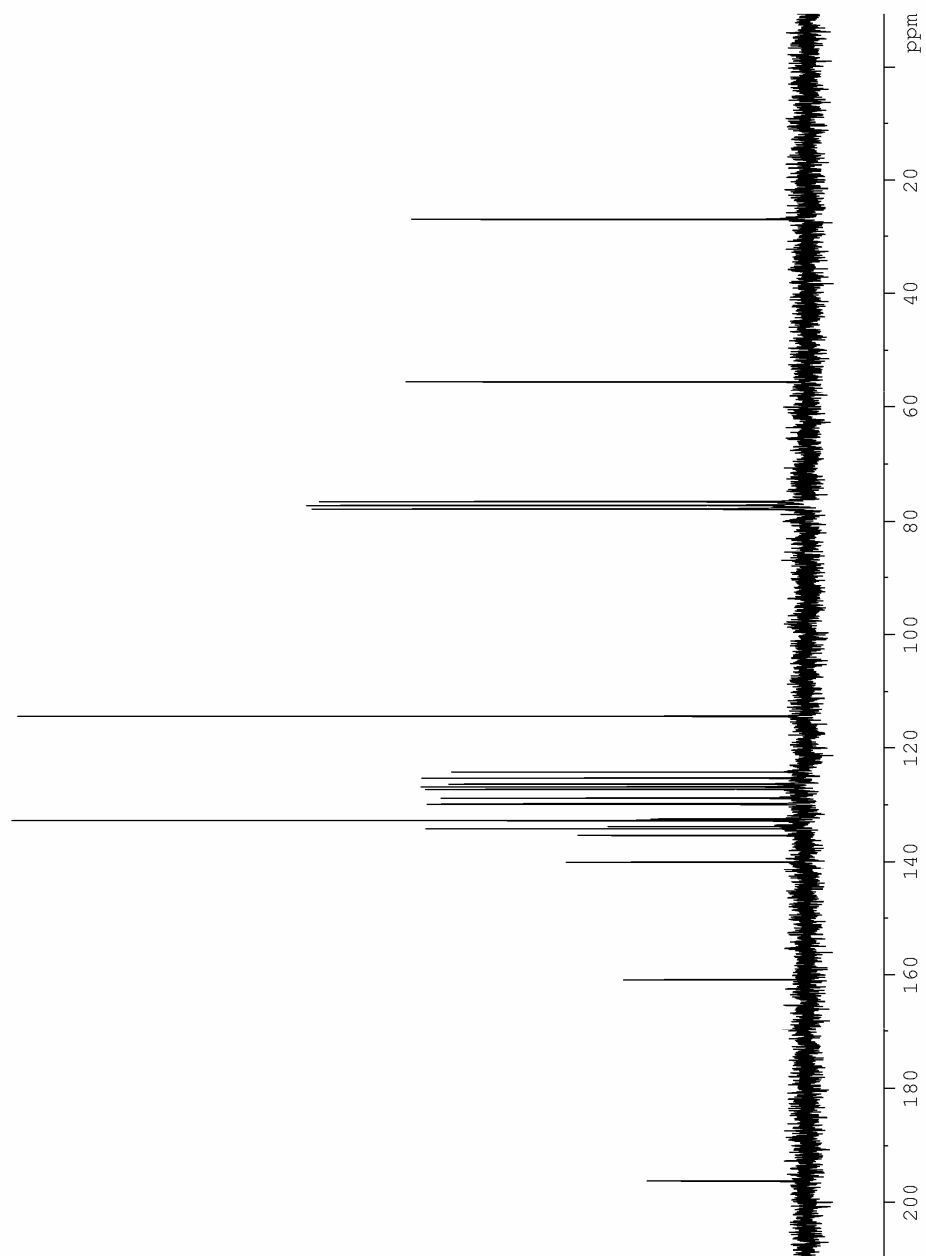

Compound 1d. Proton NMR Spectrum (units in ppm)

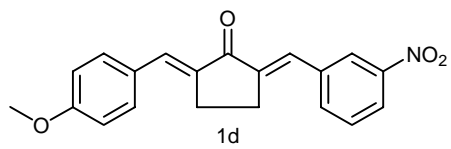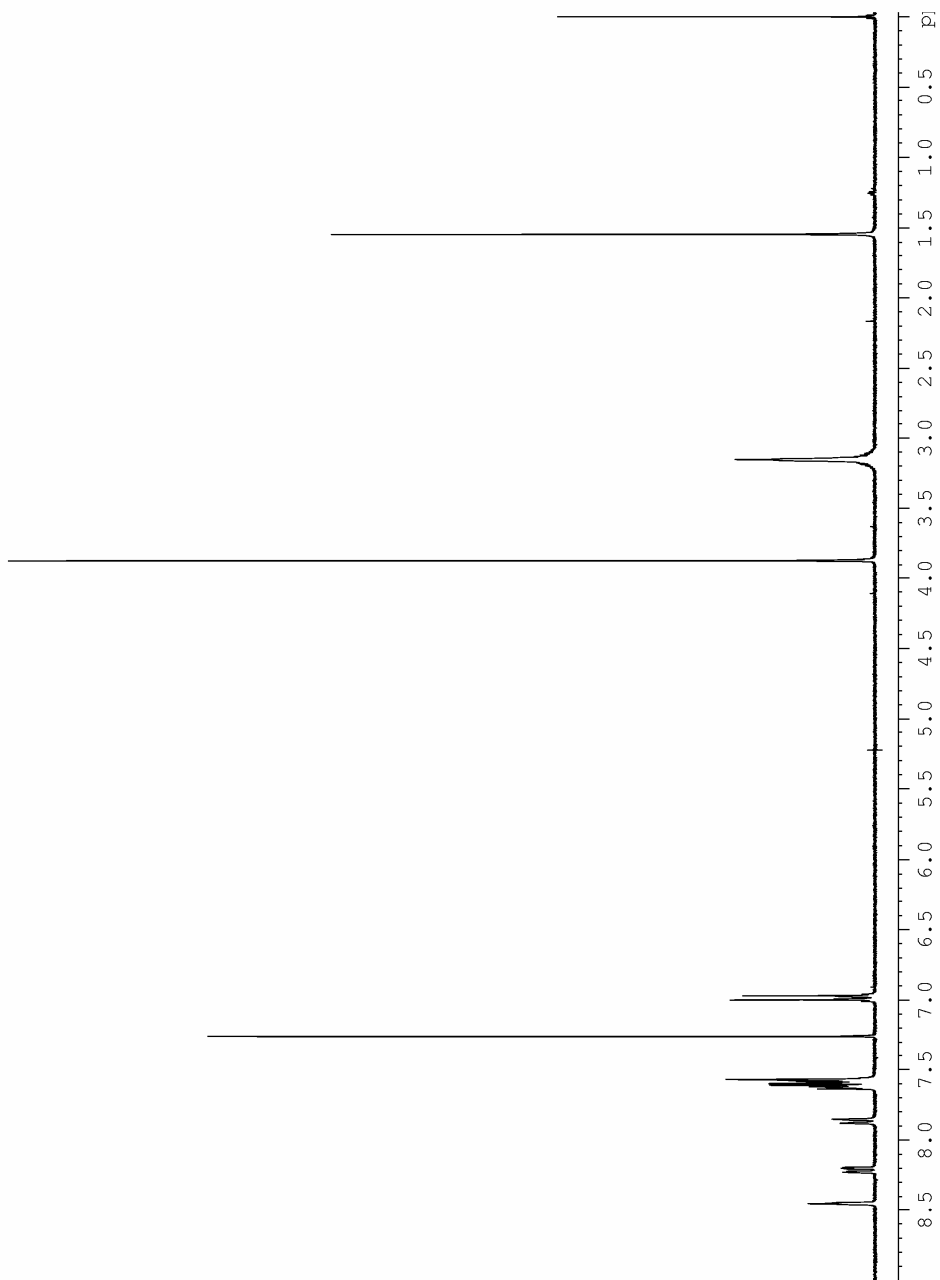



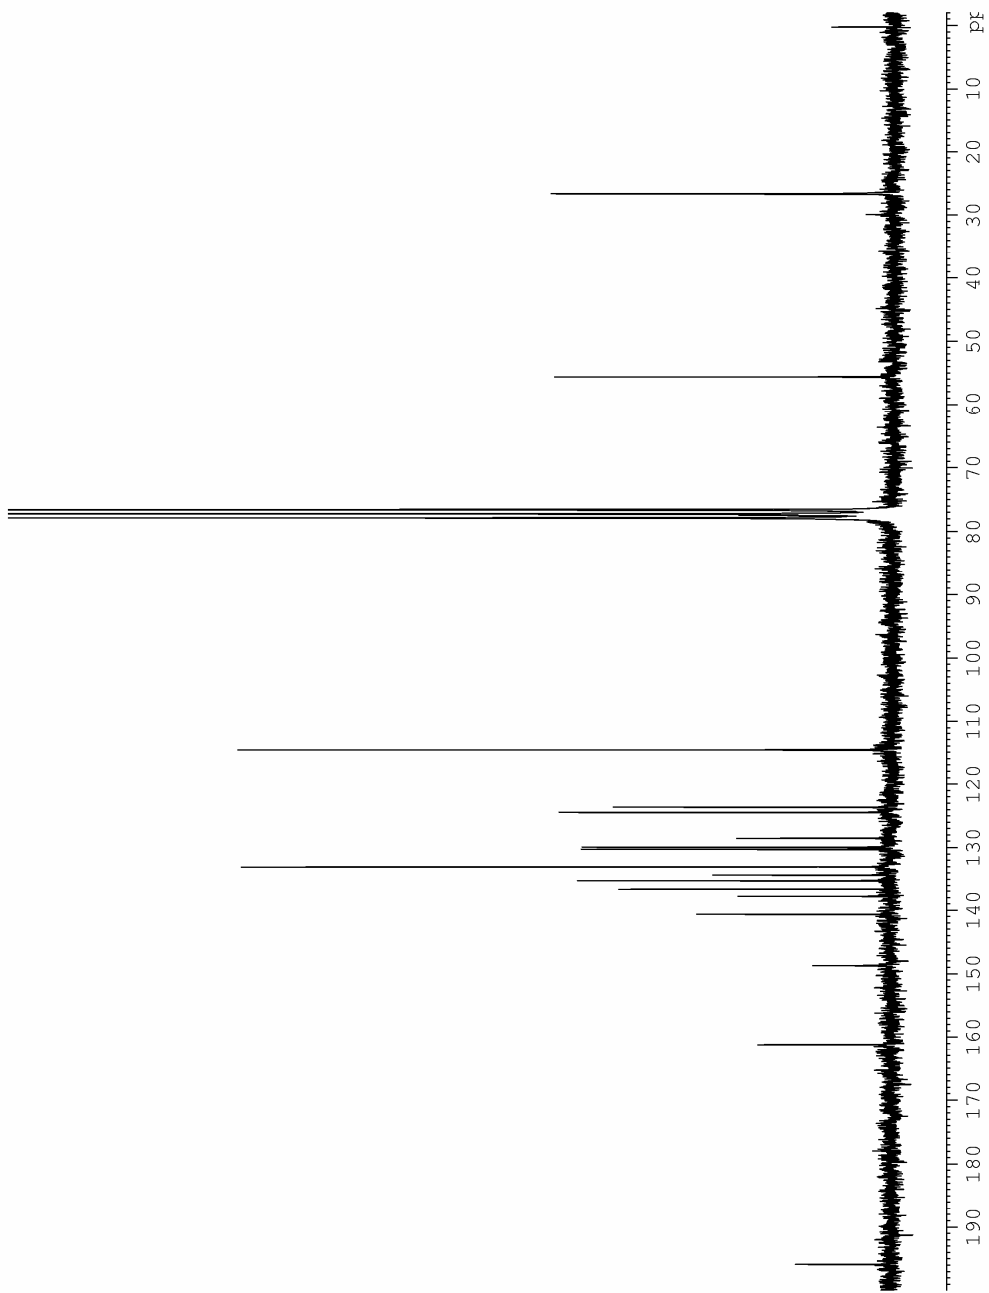

Supplement: b606042k.pdf [file b606042k.pdf]
